# Supplementary material for: Early Cellular Responses Induced by Sedimentary Calcite-Processed Particles in Bright Yellow 2 Tobacco Cultured Cells
Source: MDPI journal article supplement (doi:10.3390/ijms21124279), 2020-06-16
Supplement: s1 [file s1]

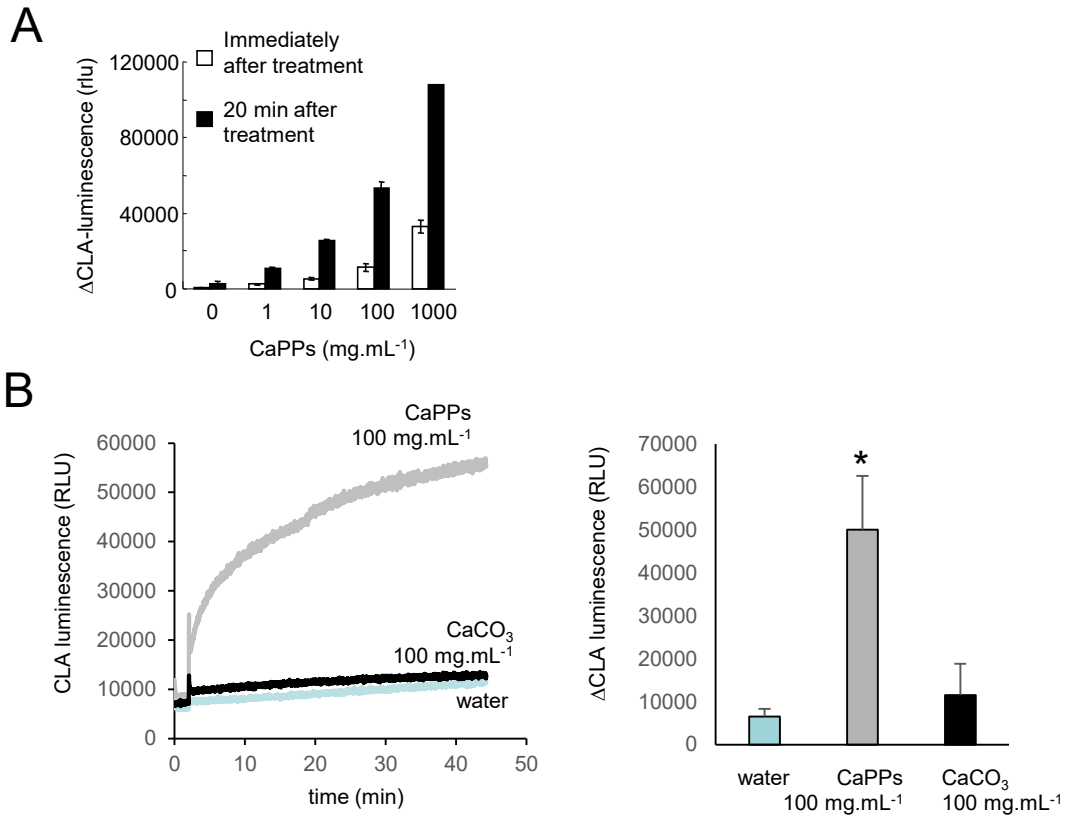

**Figure S1. A. Mean values of CaPPs-induced CLA luminescence. B.** Comparison of CaPPs- and CaCO<sub>3</sub>-induced ROS generation in free MS medium. Typical time dependent CLA luminescence increase recorded in MS medium after addition of water or, CaPPs or CaCO<sub>3</sub> at 100 mg. mL<sup>-1</sup>. Mean values of CLA chemiluminescence increase 40 min after addition of water, CaPPs or CaCO<sub>3</sub>. Data correspond to mean values  $\pm$  SD of at least six independent experiments. \* significantly different from the control with water (*p*-values  $\leq$  0.05).

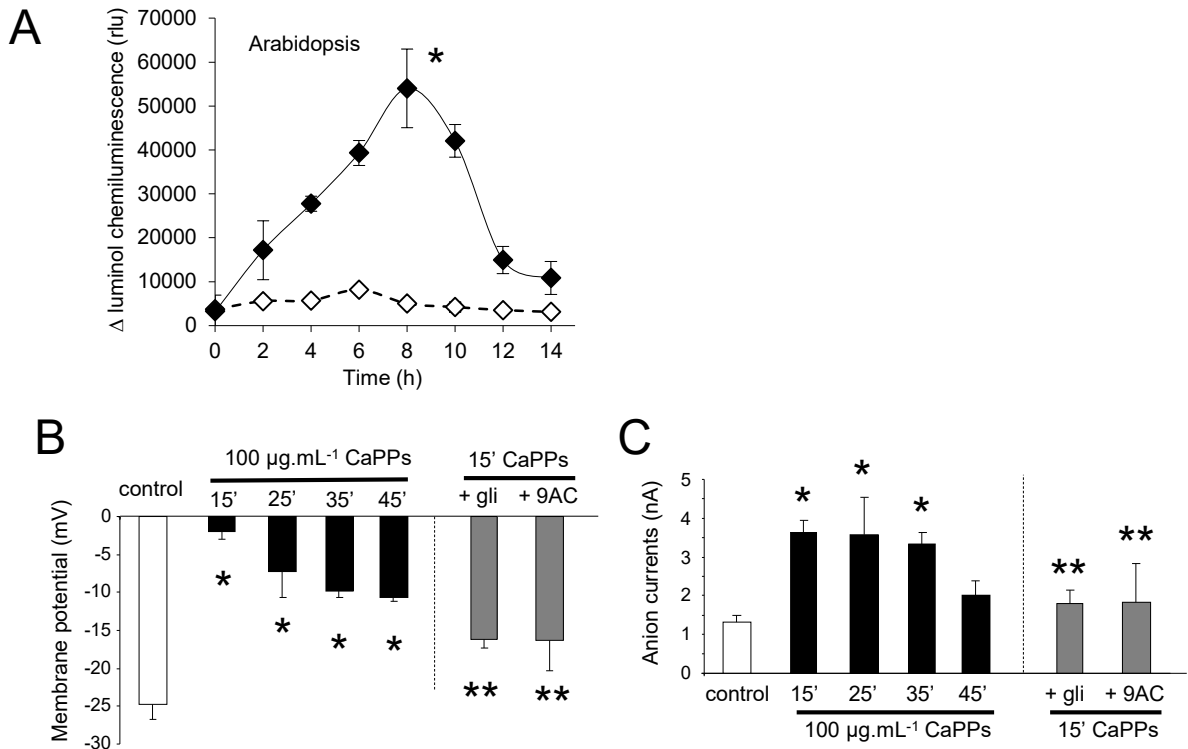

**Figure S2** : *Arabidopsis thaliana* L. cultured cells, cell line T87 generated from the ecotype Columbia plant, were grown in Gamborg medium complemented with 20 g.L<sup>-1</sup> sucrose, 2 mg.L<sup>-1</sup> 2,4 D, 0.1 mg.L<sup>-1</sup> kinetin at 22 ± 2 ° C under continuous white light (40 µE.m<sup>-2</sup>.s<sup>-1</sup>) with continuous shaking (gyratory shaker at 120 rpm), as previously described (Kadono *et al.* 2010). Cell cultures were sub-cultured weekly using a 1:10 dilution. All experiments were performed at 22 ± 2 ° C using log-phase cells (4 days after sub-culture).

**A.** Kinetic of biological ROS generation detected with luminol during 7 h after addition of 100 µg.mL<sup>-1</sup> CaPPs. **B.** Mean values of polarizations for *A. thaliana* cells treated during different times with 100 µg.mL<sup>-1</sup> CaPPs and mean values of polarizations for *A. thaliana* cells treated 15 minutes with 100 µg.mL<sup>-1</sup> CaPPs in presence of 200 µM glibenclamide (gli) or 200 µM 9-anthracen carboxylic acid (9AC), two unrelated anion channel inhibitors.

**C.** Mean values of anion currents for *A. thaliana* cells treated during different times with 100 µg.mL<sup>-1</sup> CaPPs and mean values of anion currents for *A. thaliana* cells treated 15 minutes with 100 µg.mL<sup>-1</sup> CaPPs in presence of 200 µM gli or 200 µM 9AC. Currents were recorded at -200 mV and 1.8 s of voltage clamp. (See Tran *et al.* 2013 for methods related to electrophysiological on *A. thaliana*). Data correspond to mean values ± SD of at least six independent experiments. \* significantly different from the control (p-values ≤ 0.05). \*\* significantly different from the treatment at 15 min (p-values ≤ 0.05).

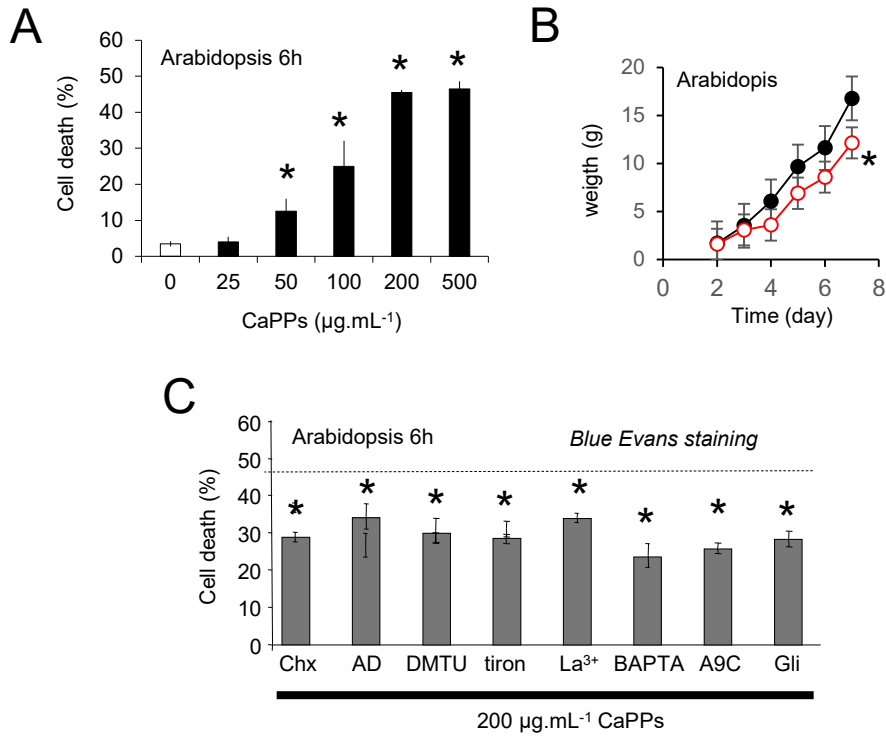

**Figure S3** : **A**. Dose dependent cell death reaching about 50 % of the *Arabidopsis thaliana* cell population was observed after 6 h after treatment with 200  $\mu\text{g. mL}^{-1}$  CaPPs. **B**. Decrease of the culture growth induced by 200  $\mu\text{g. mL}^{-1}$  CaPPs. **Measurements were made on 50 mL of suspension cells**. **C**. Decrease of cell death extent by pretreatments with actinomycin D (AD, 20  $\mu\text{g/ml}$ ), cycloheximide (Chx, 20  $\mu\text{g/ml}$ ), inhibitors of traduction and translation, ROS scavengers Tiron (5mM) and DMTU (100 mM), Ca<sup>2+</sup> channel blocker La<sup>3+</sup> (500  $\mu\text{M}$ ), Ca<sup>2+</sup> chelator, BAPTA (3 mM), and anion channel blockers, glibenclamide (gli 200  $\mu\text{M}$ ) and 9AC (200  $\mu\text{M}$ ). For each pretreatments, cells were incubated for 15 min before CaPPs treatment. **The dashed line correspond to the cell death extent induced by 200  $\mu\text{g.mL}^{-1}$  CaPPs.** \* significantly different from the control (p-values  $\leq 0.05$ ).

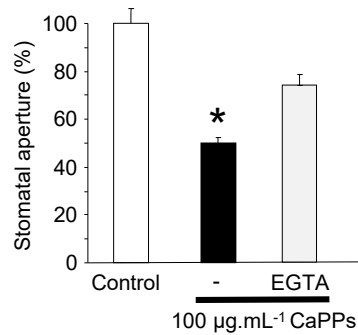

**Figure S4:** Applications of 100 µg.mL<sup>-1</sup> CaPPs reduce the stomatal aperture of *A. thaliana* leaves. In presence of 3 mM EGTA, the CaPPs-induced stomatal closure was reduced. Epidermal strips were carefully prepared from abaxial epidermis then placed cuticle side-down on microscope slides covered with medical adhesive and immediately floated in 10 mM MES pH 6.1, 50 mM KCl, 1 mM CaCl<sub>2</sub> (opening buffer) under white light (40 µmol photons m<sup>-2</sup> s<sup>-1</sup>) for 3 h before treatment. Means of 100 measurements of individual stomata, with standard errors. \* significantly different from the control (p-values ≤ 0.05).
